# Supplementary material
Source: publisher figshare collection journal article supplement (https://acs.figshare.com/ndownloader/files/4404775)
Supplement: Supplementary file 1 [file 4404775]

# Synthesis and Optical Properties of Trioxatriangulenium Dyes with One and Two Peripheral Amino Substituents

*Thomas J. Sørensen and Bo W. Laursen\**

Nano-Science Center and Department of Chemistry, University of Copenhagen, Universitetsparken  
5, DK-2100 København Ø, Denmark

bwl@nano.ku.dk

Table of contents:

|                                                             |          |
|-------------------------------------------------------------|----------|
| <u>NMR spectra of the synthesized compounds</u>             | <u>2</u> |
| Compound <b>1</b> , $^1\text{H}$ NMR                        | 2        |
| Compound <b>2</b> , $^1\text{H}$ NMR & $^{13}\text{C}$ NMR  | 3        |
| Compound <b>3</b> , $^1\text{H}$ NMR & $^{13}\text{C}$ NMR  | 4        |
| Compound <b>4</b> , $^1\text{H}$ NMR & $^{13}\text{C}$ NMR  | 5        |
| Compound <b>5a</b> , $^1\text{H}$ NMR & $^{13}\text{C}$ NMR | 6        |
| Compound <b>5b</b> , $^1\text{H}$ NMR & $^{13}\text{C}$ NMR | 7        |
| Compound <b>5c</b> , $^1\text{H}$ NMR & $^{13}\text{C}$ NMR | 8        |
| Compound <b>6a</b> , $^1\text{H}$ NMR & $^{13}\text{C}$ NMR | 9        |
| Compound <b>6b</b> , $^1\text{H}$ NMR                       | 10       |
| Compound <b>6c</b> , $^1\text{H}$ NMR & $^{13}\text{C}$ NMR | 11       |
| Compound <b>7</b> , $^1\text{H}$ NMR & $^{13}\text{C}$ NMR  | 12       |
| Compound <b>8a</b> , $^1\text{H}$ NMR                       | 13       |
| Compound <b>8b</b> , $^1\text{H}$ NMR & $^{13}\text{C}$ NMR | 14       |
| Compound <b>9a</b> , $^1\text{H}$ NMR & $^{13}\text{C}$ NMR | 15       |
| Compound <b>9b</b> , none                                   | 17       |

## NMR spectra of the synthesized compounds

*Ethyl 2,6-dimethoxybenzoate (1)*:

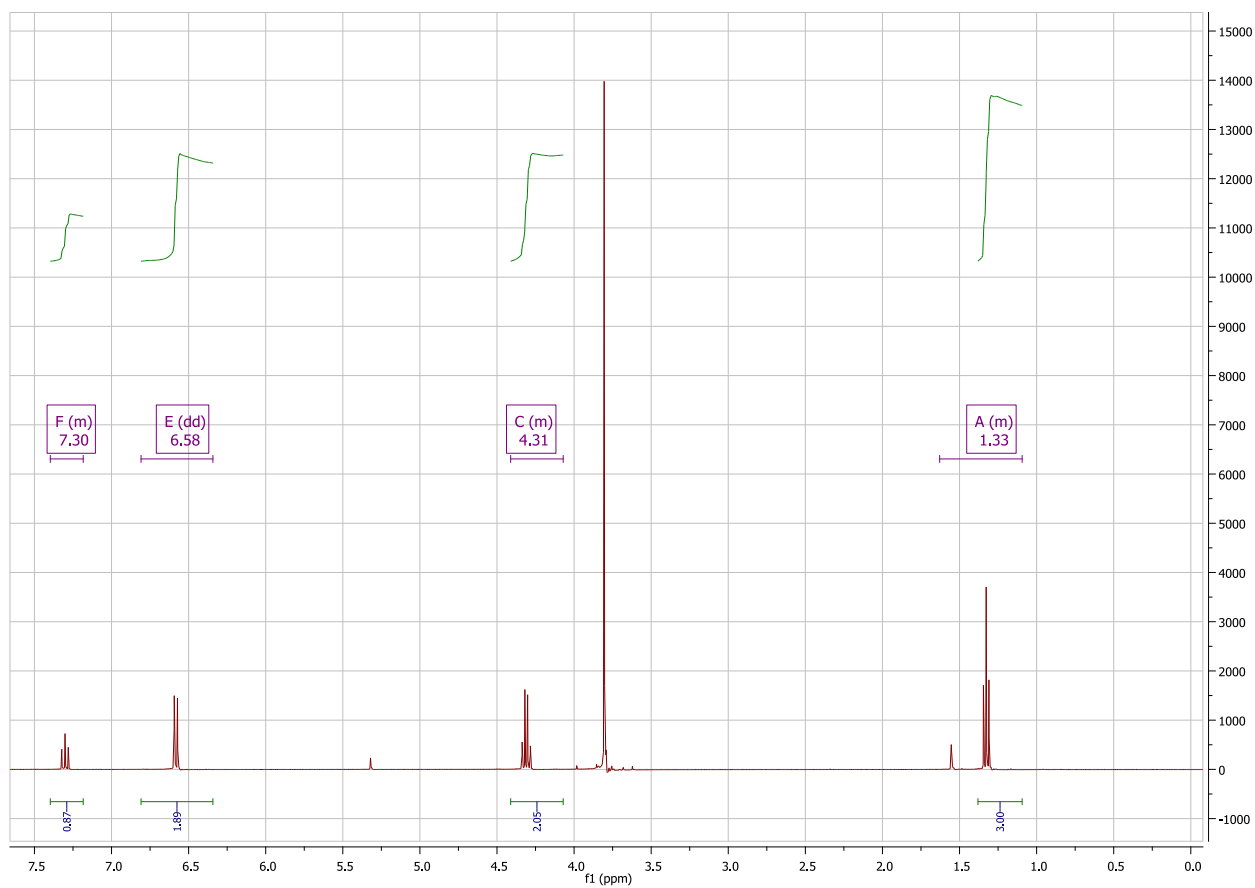

*Ethyl 2,4,6-trimethoxybenzoate (2):*

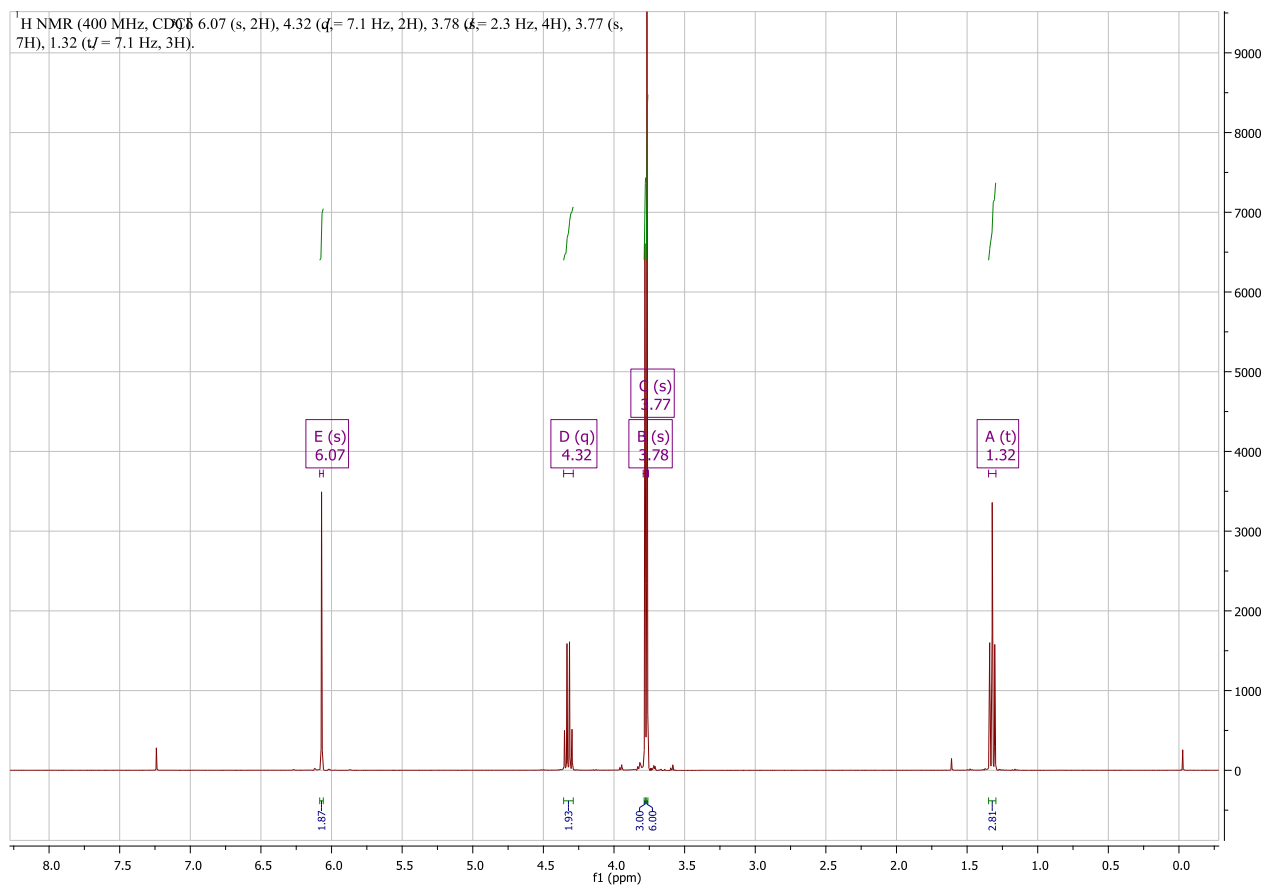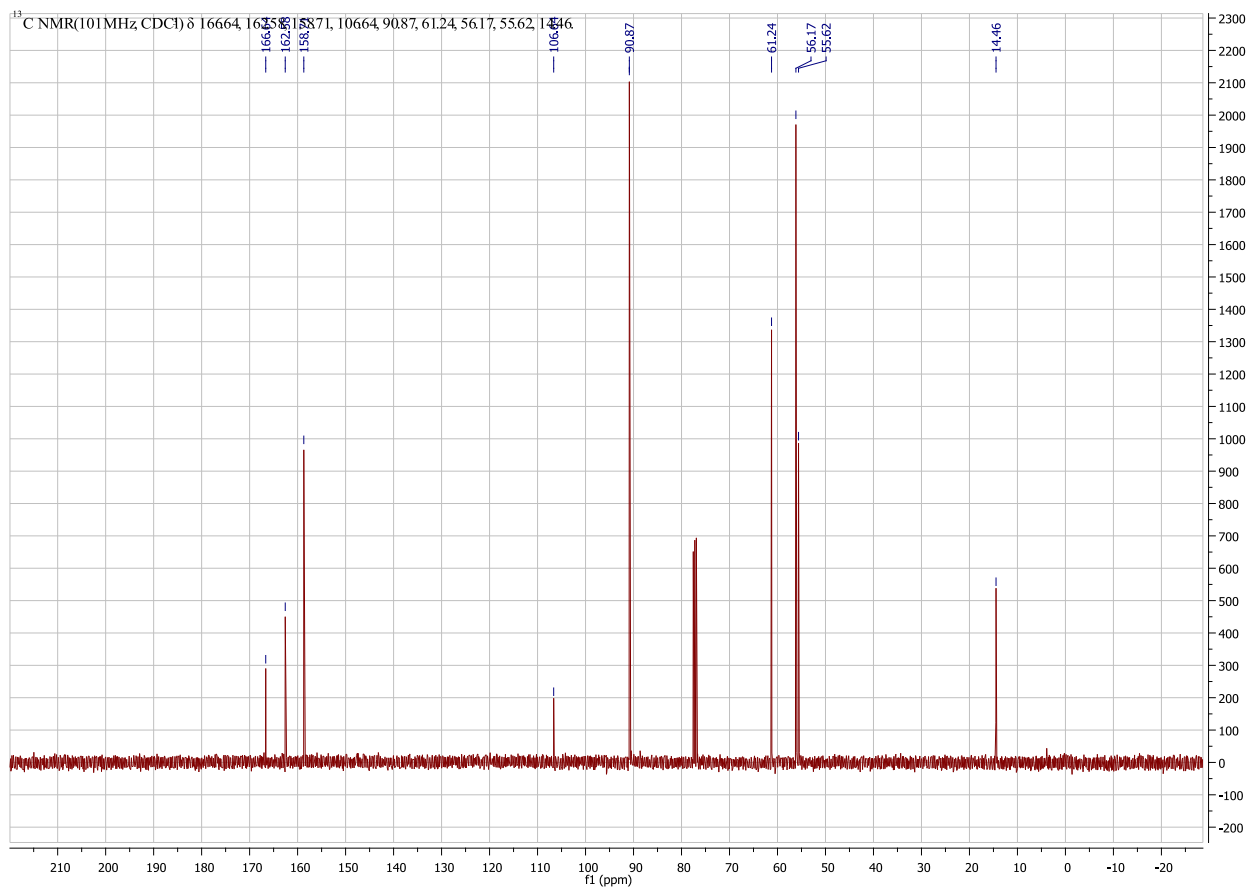

***Bis(2,6-dimethoxyphenyl)-(2,4,6-trimethoxyphenyl)-methylum hexafluorophosphate (3):***

OBS. The compound is unstable in solution. The extra peaks in the aromatic region and the grass around 3.5 ppm is from the helicene formed by this reaction and will appear in all spectra recorded after ~5 min. after in solution.

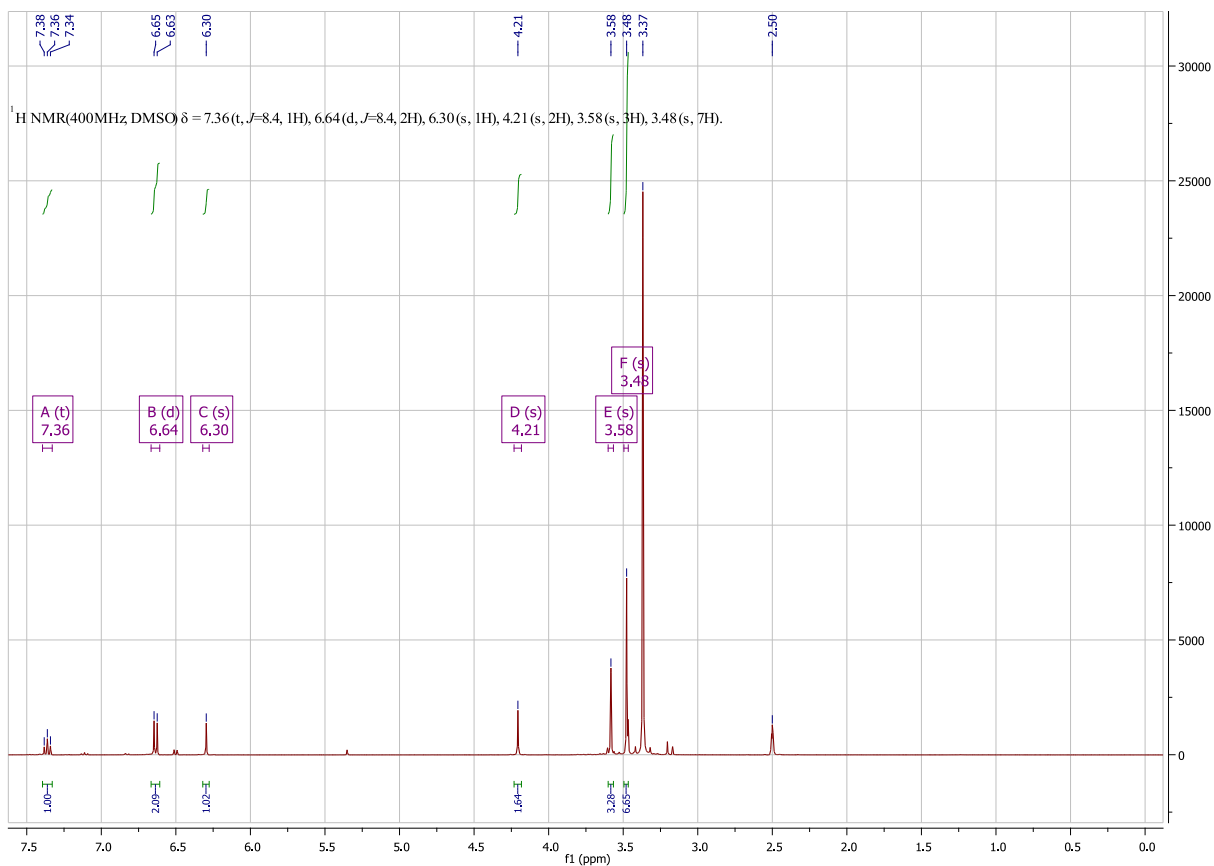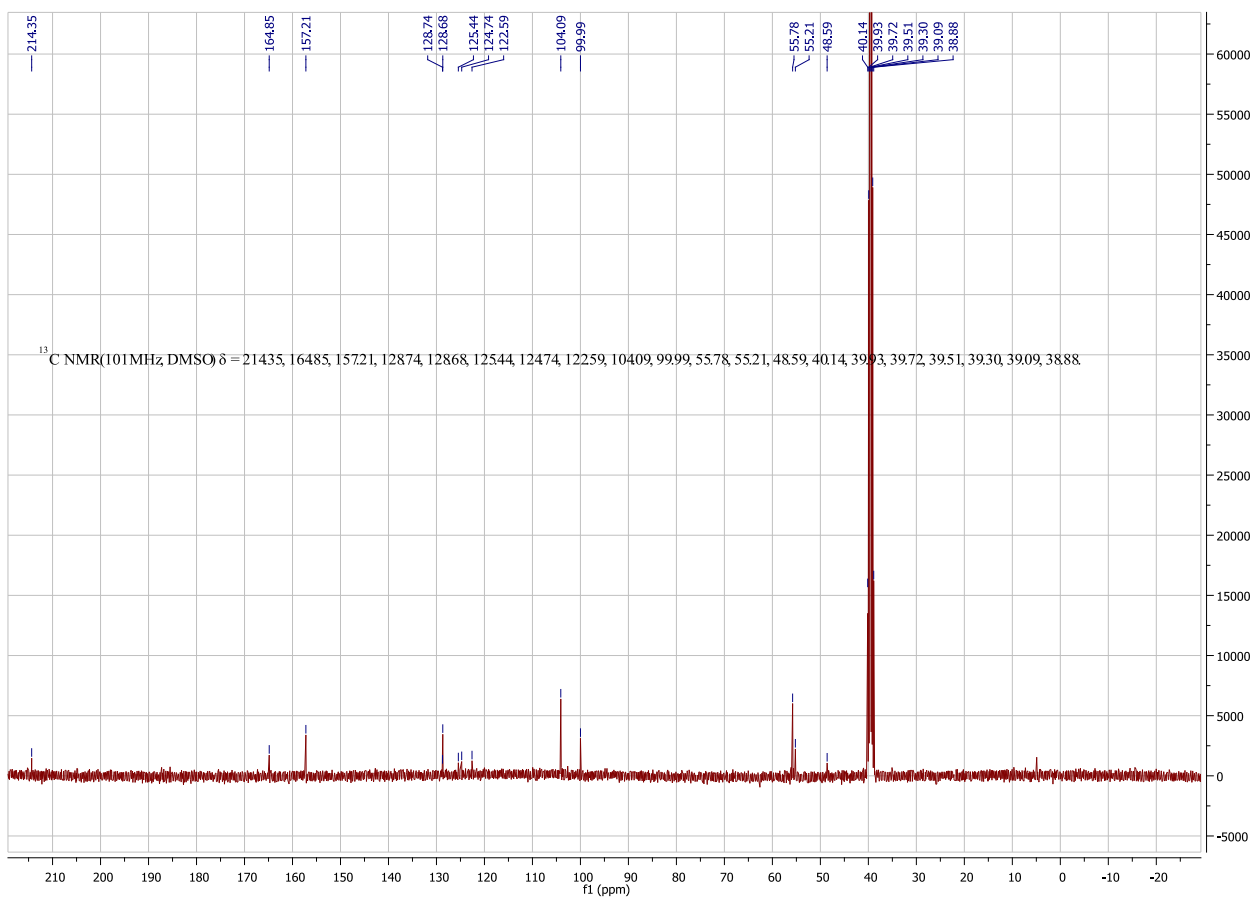

(2,6-dimethoxyphenyl)-bis(2,4,6-trimethoxyphenyl)-methylum hexafluorophosphate (**4**):

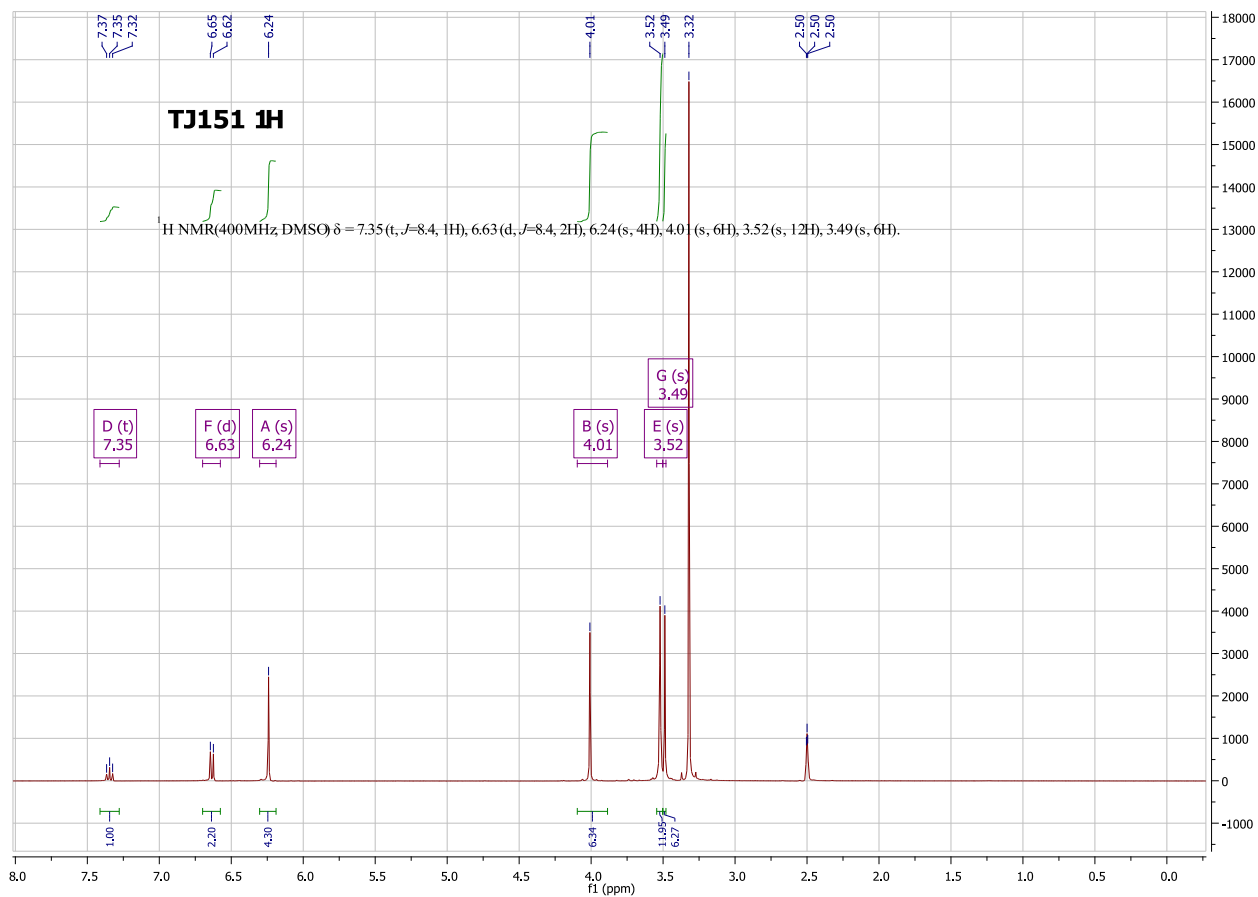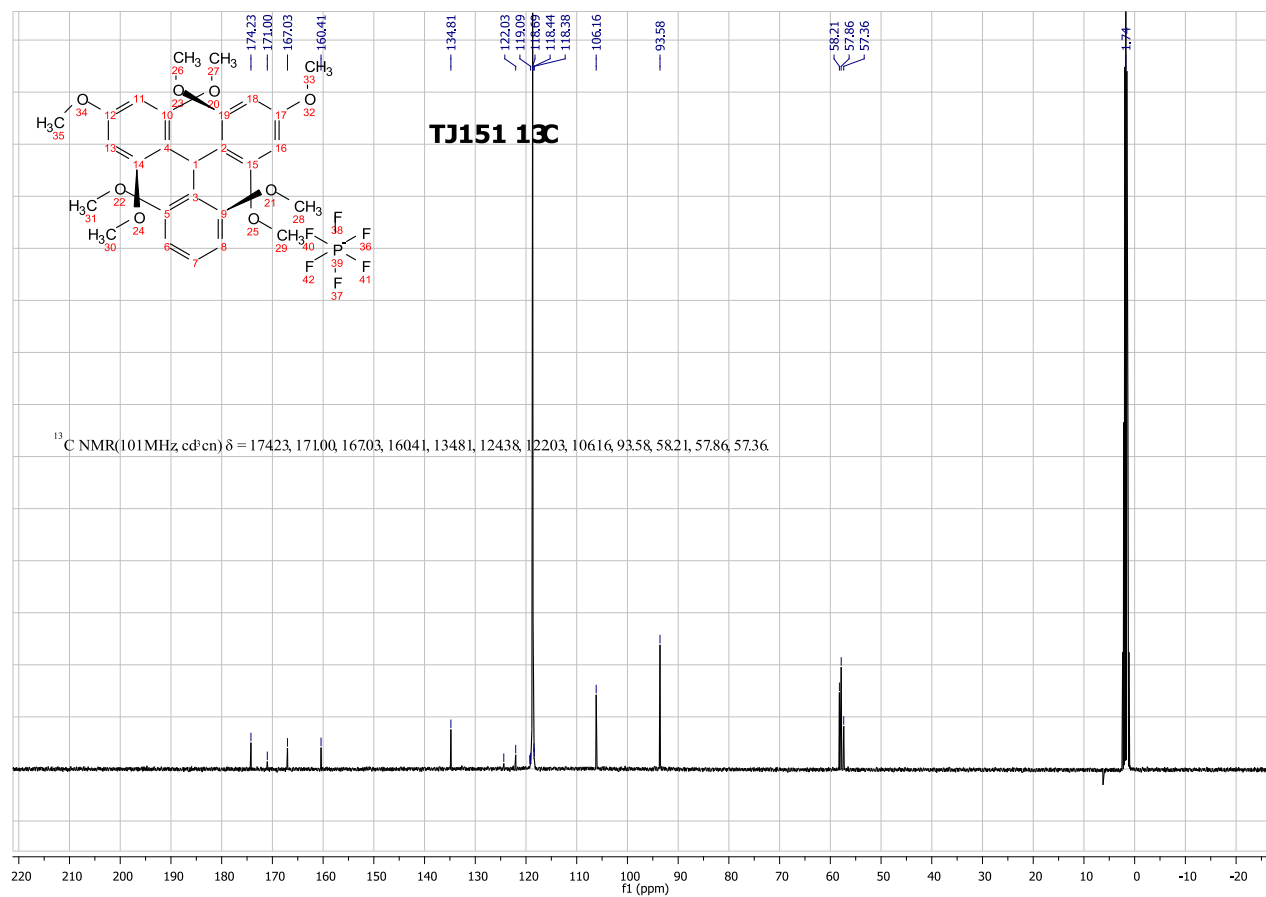

*Bis(2,6-dimethoxyphenyl)-(4-diethylamino-2,6-trimethoxyphenyl)-methylium hexafluorophosphate (5a):*

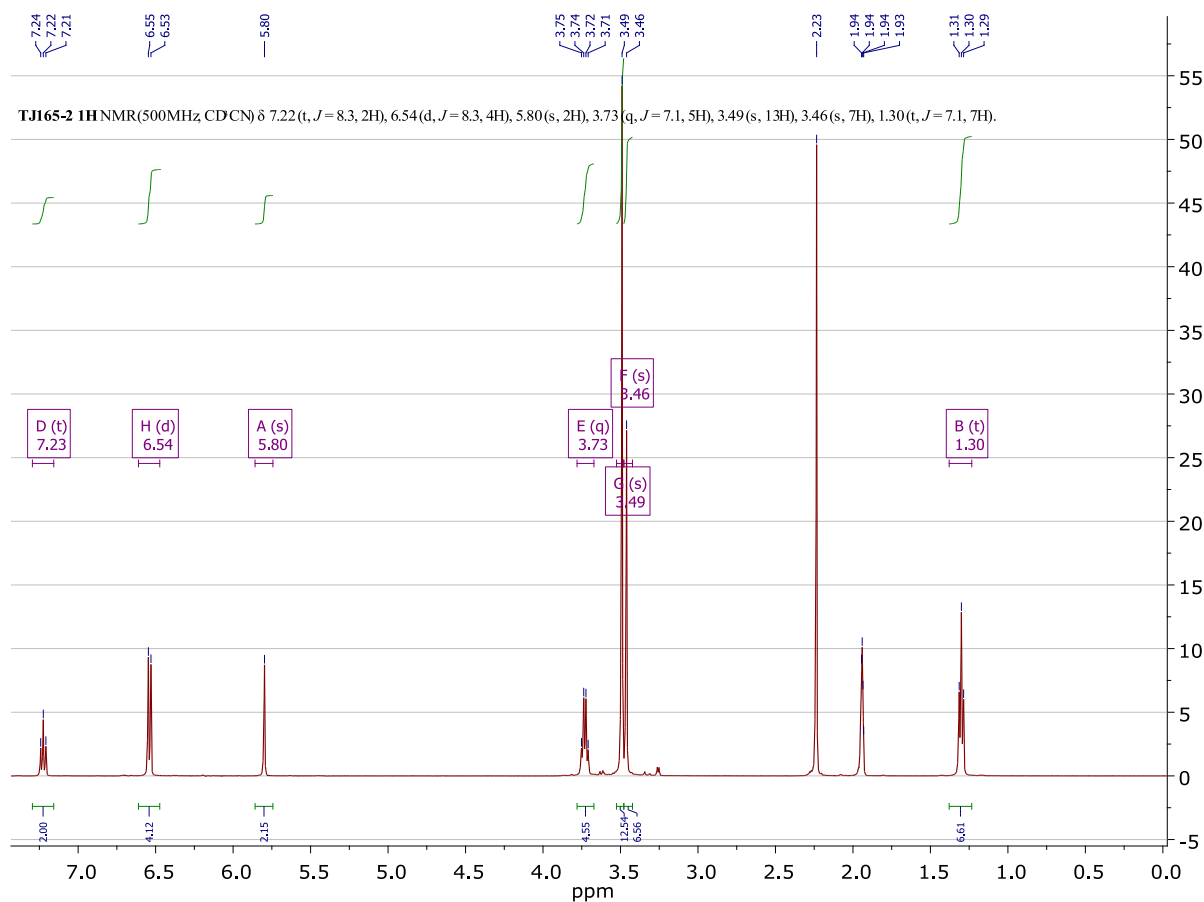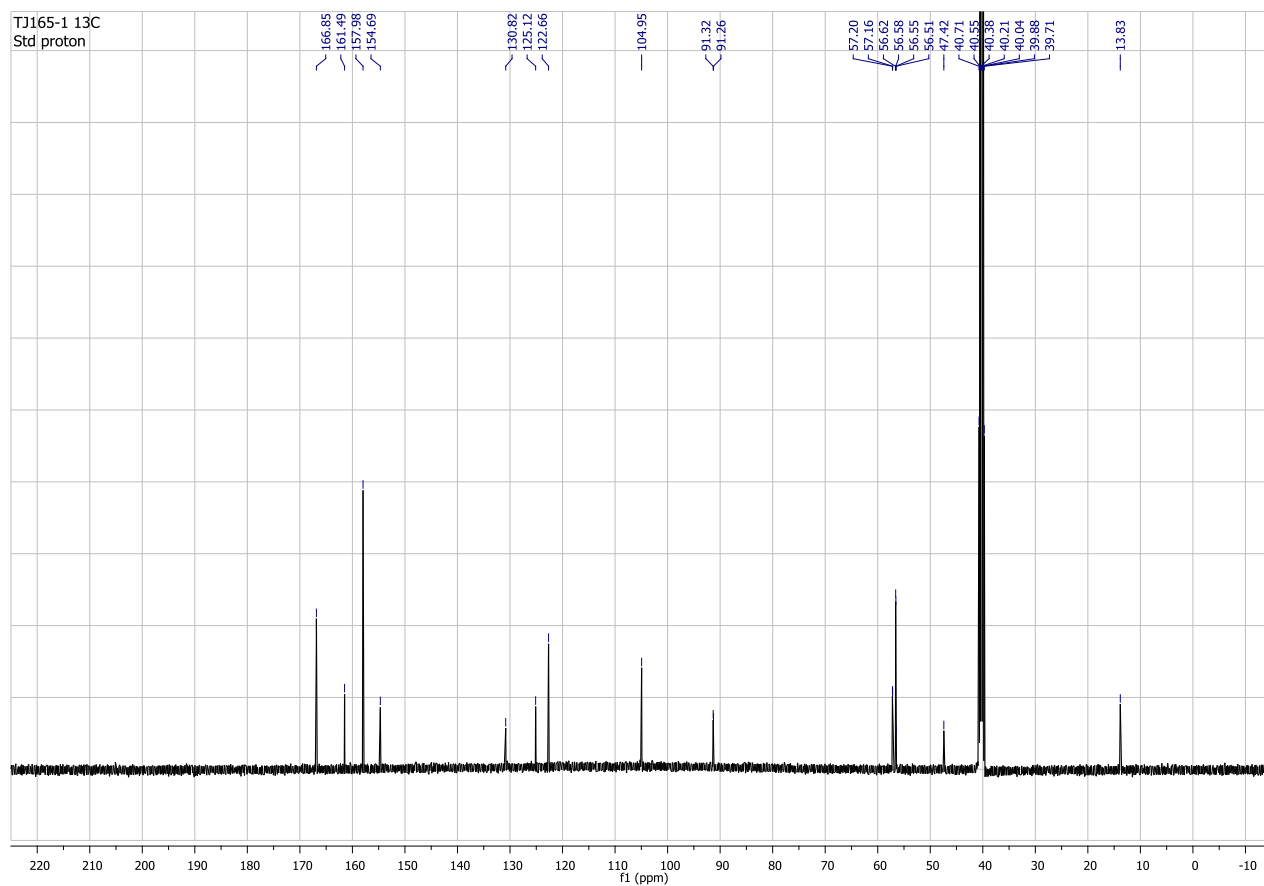

*Bis(2,6-dimethoxyphenyl)-(4-didecylamino-2,6-trimethoxyphenyl)-methylum tetrafluoroborate (5b):*

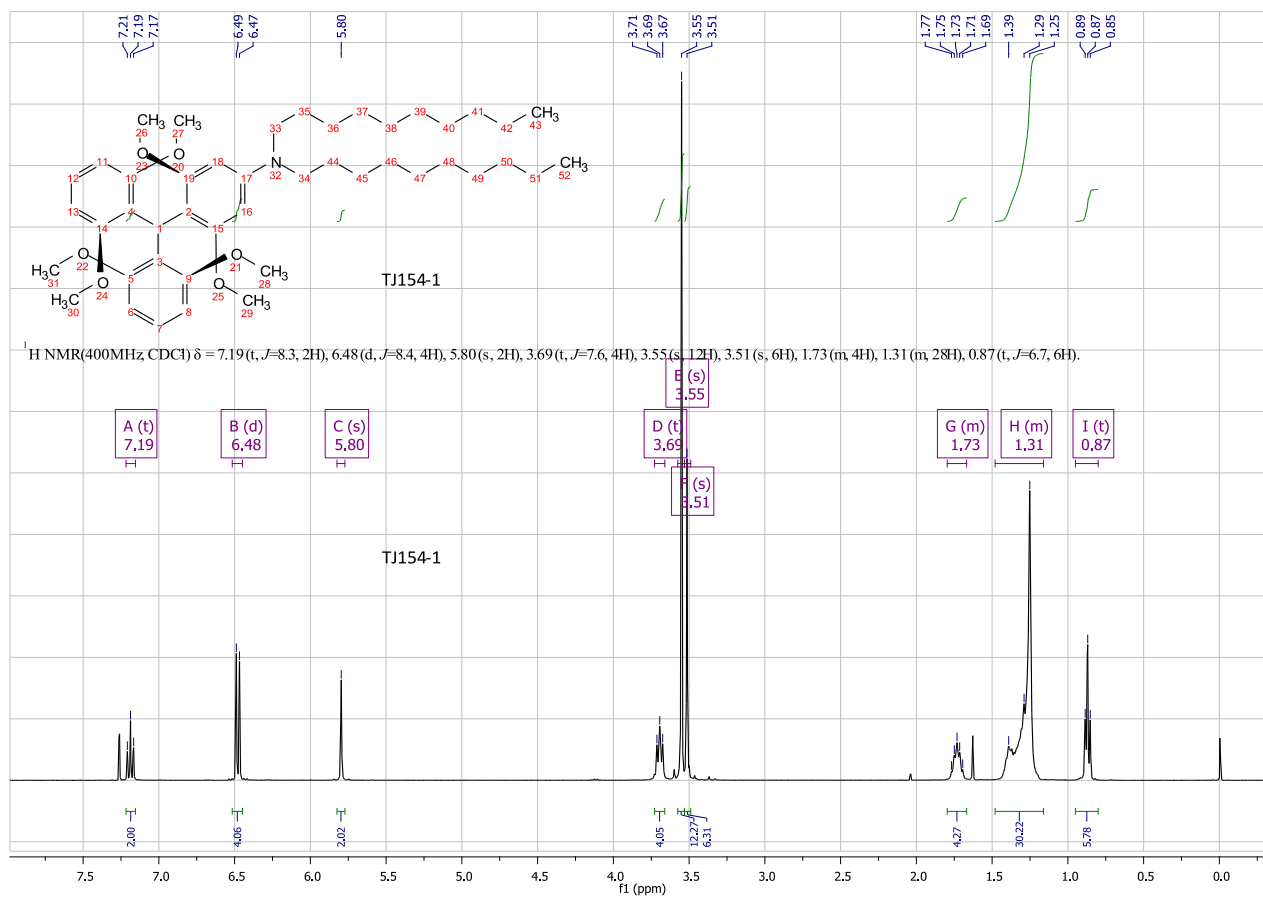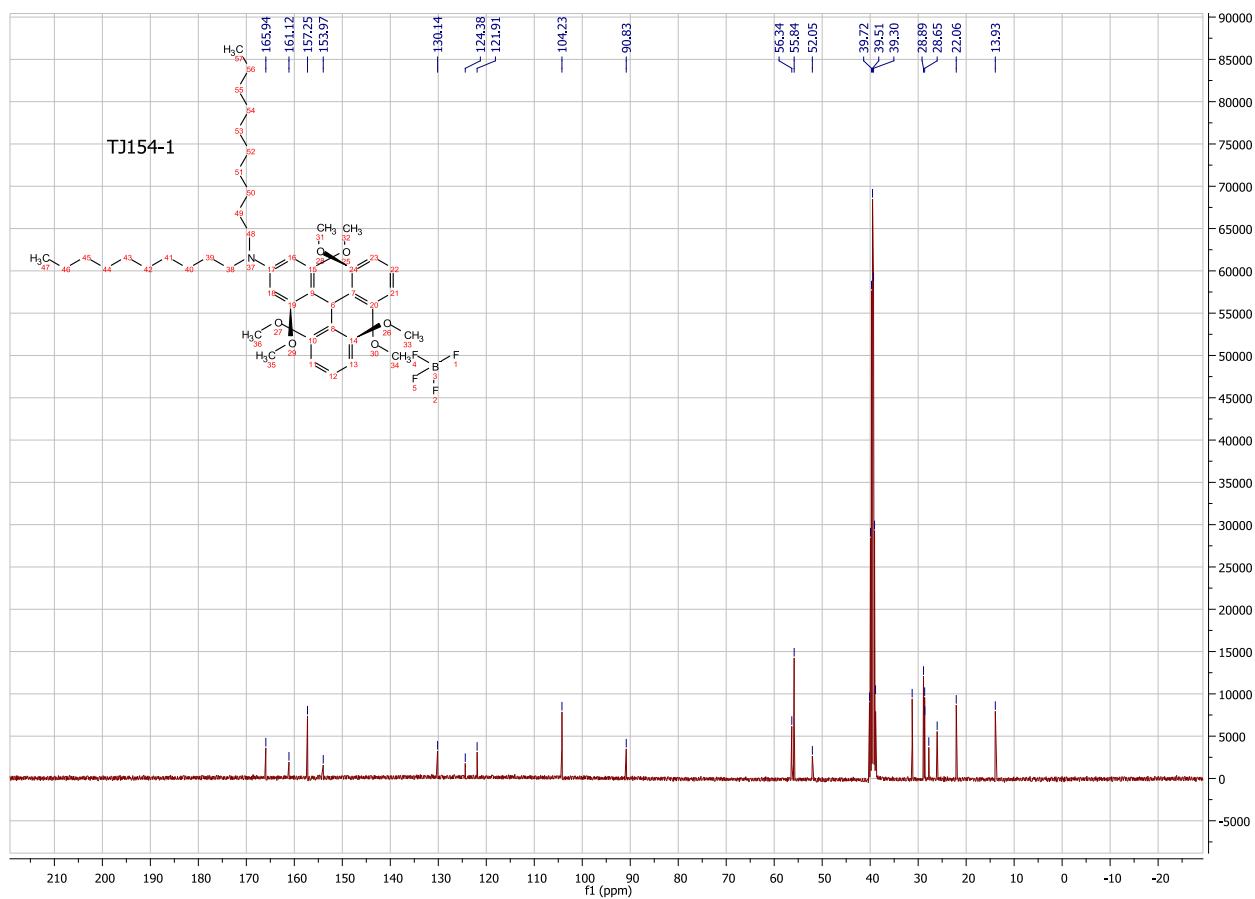

*Bis(2,6-dimethoxyphenyl)-(4-dimethylamino-2,6-dimethoxyphenyl)-methylium hexafluorophosphate (5c):*

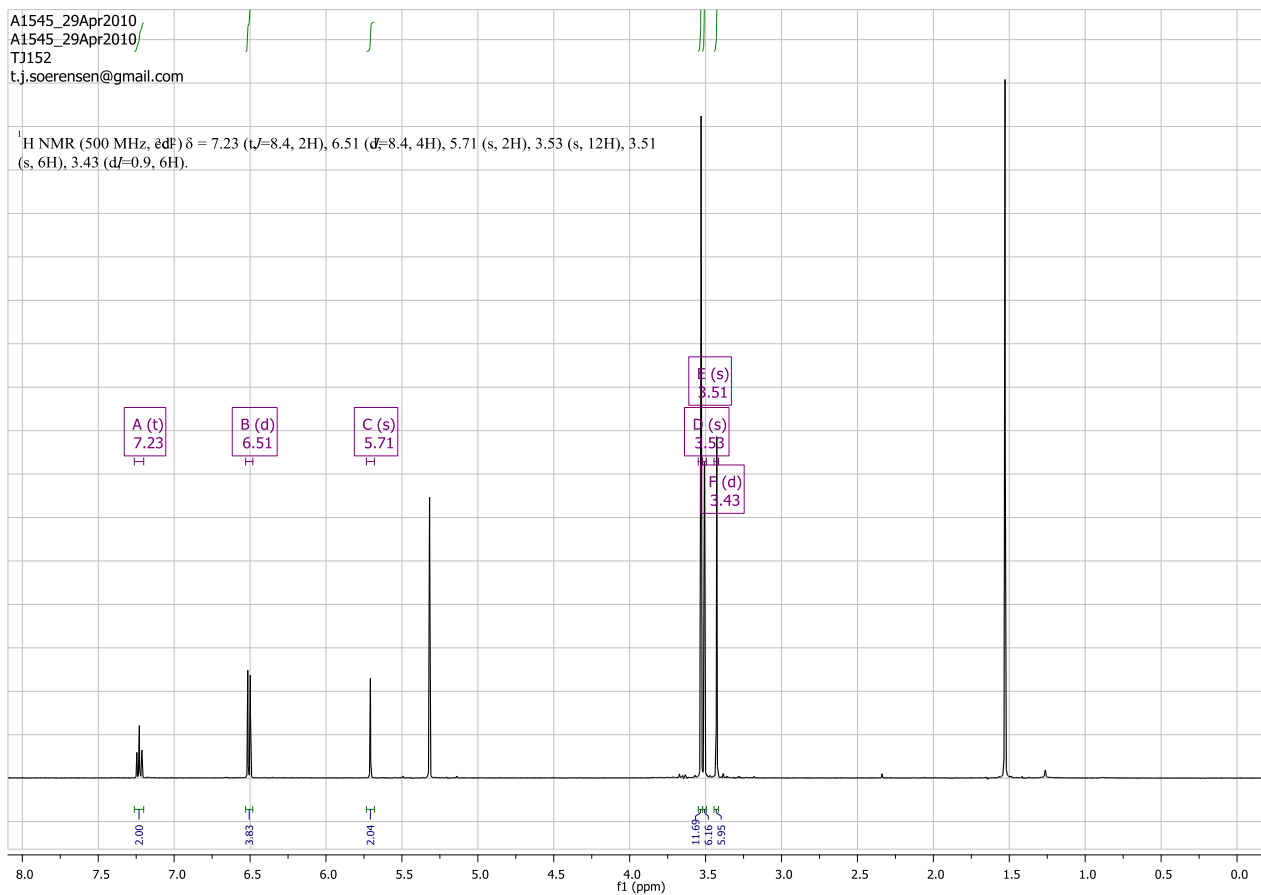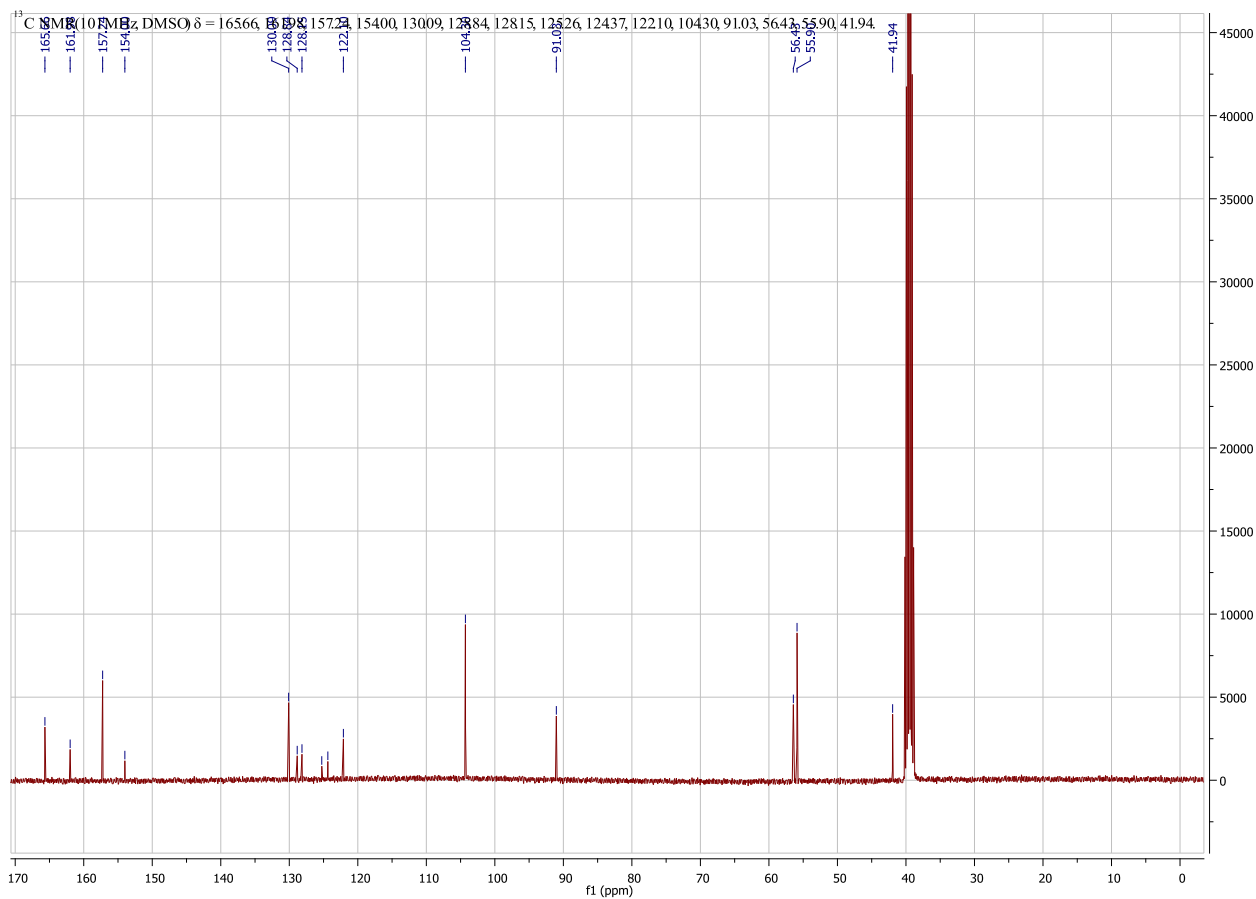

(2,6-dimethoxyphenyl)-bis(4-diethylamino-2,6-dimethoxyphenyl)-methylium hexafluorophosphate (**6a**):

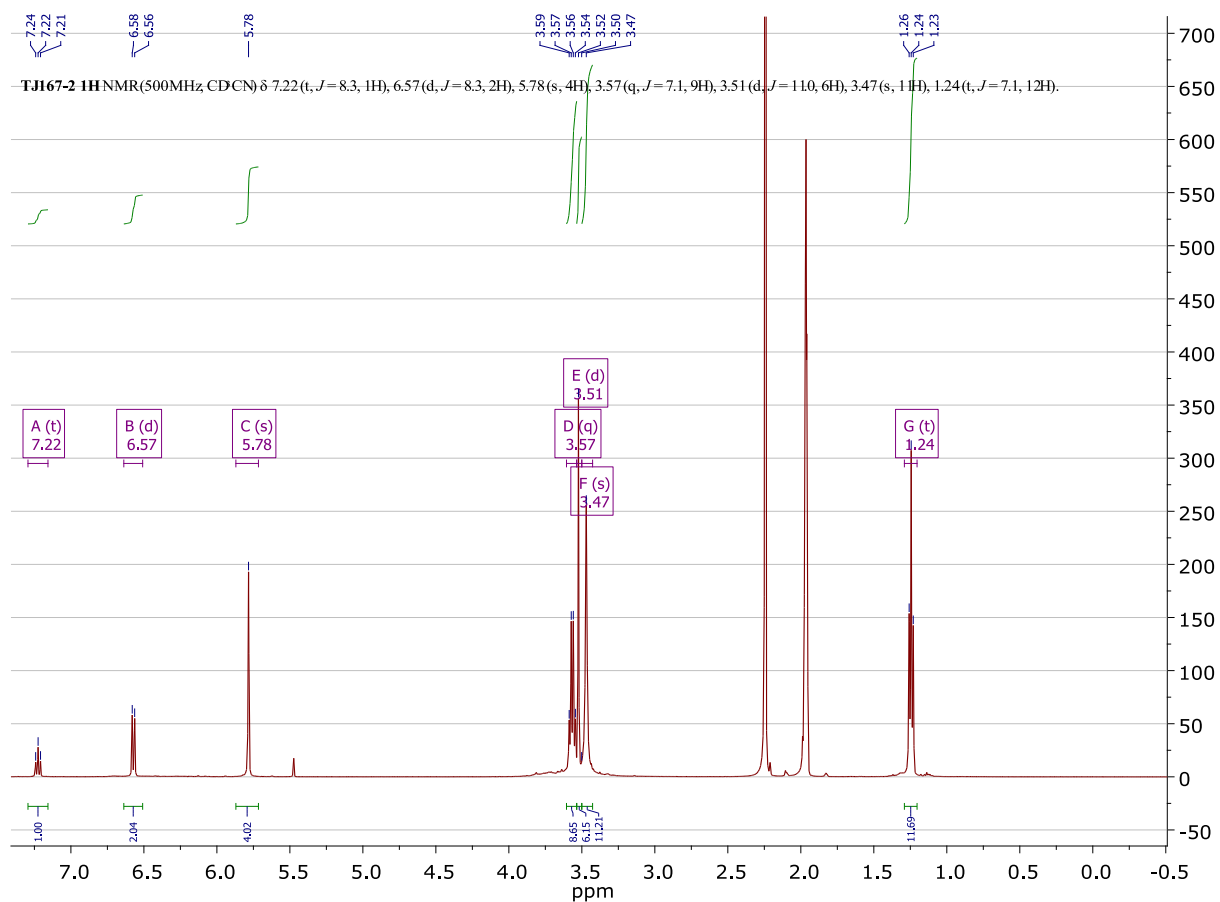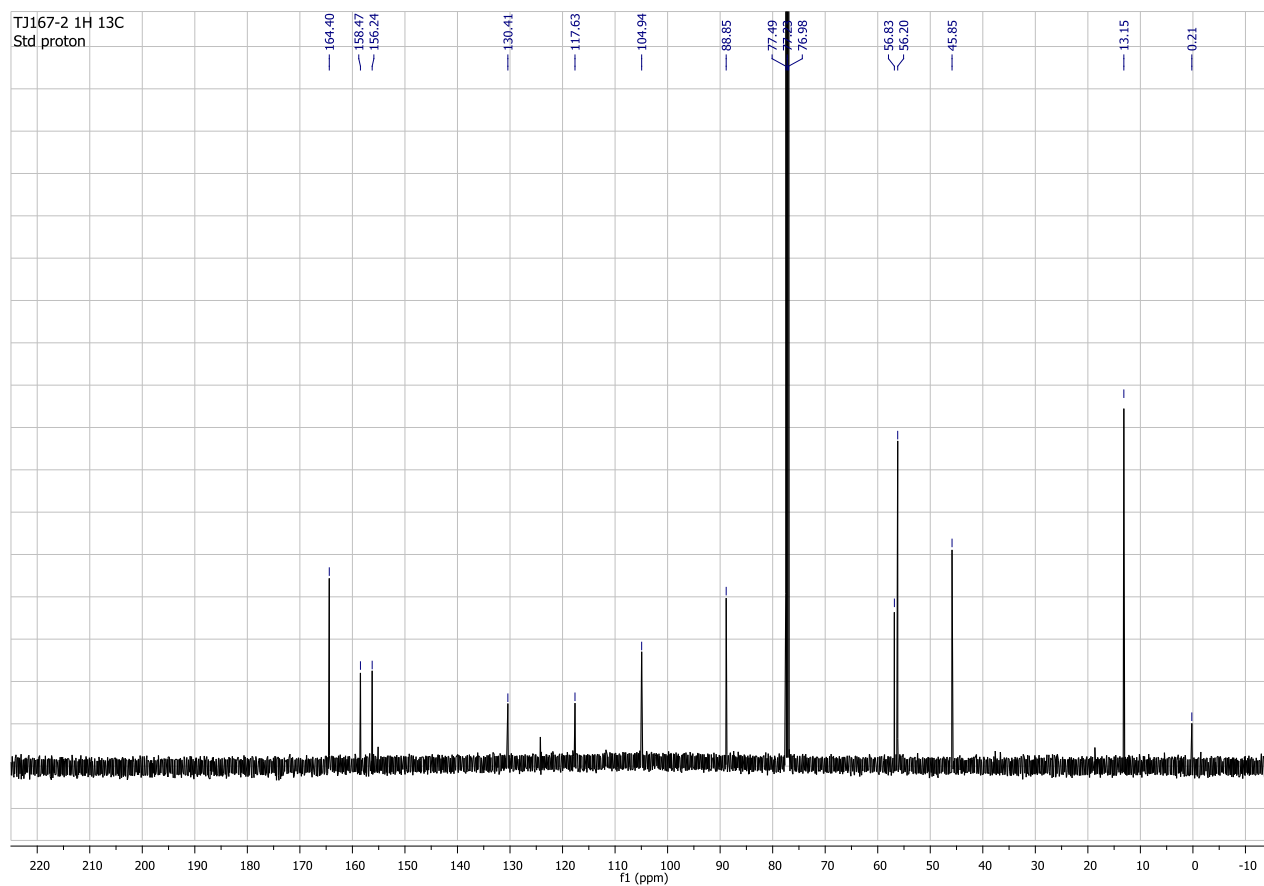

*(2,6-dimethoxyphenyl)-bis(4-didecylamino-2,6-dimethoxyphenyl)-methylium hexafluorophosphate (6b):*

Co-crystallizes with didecylamine.

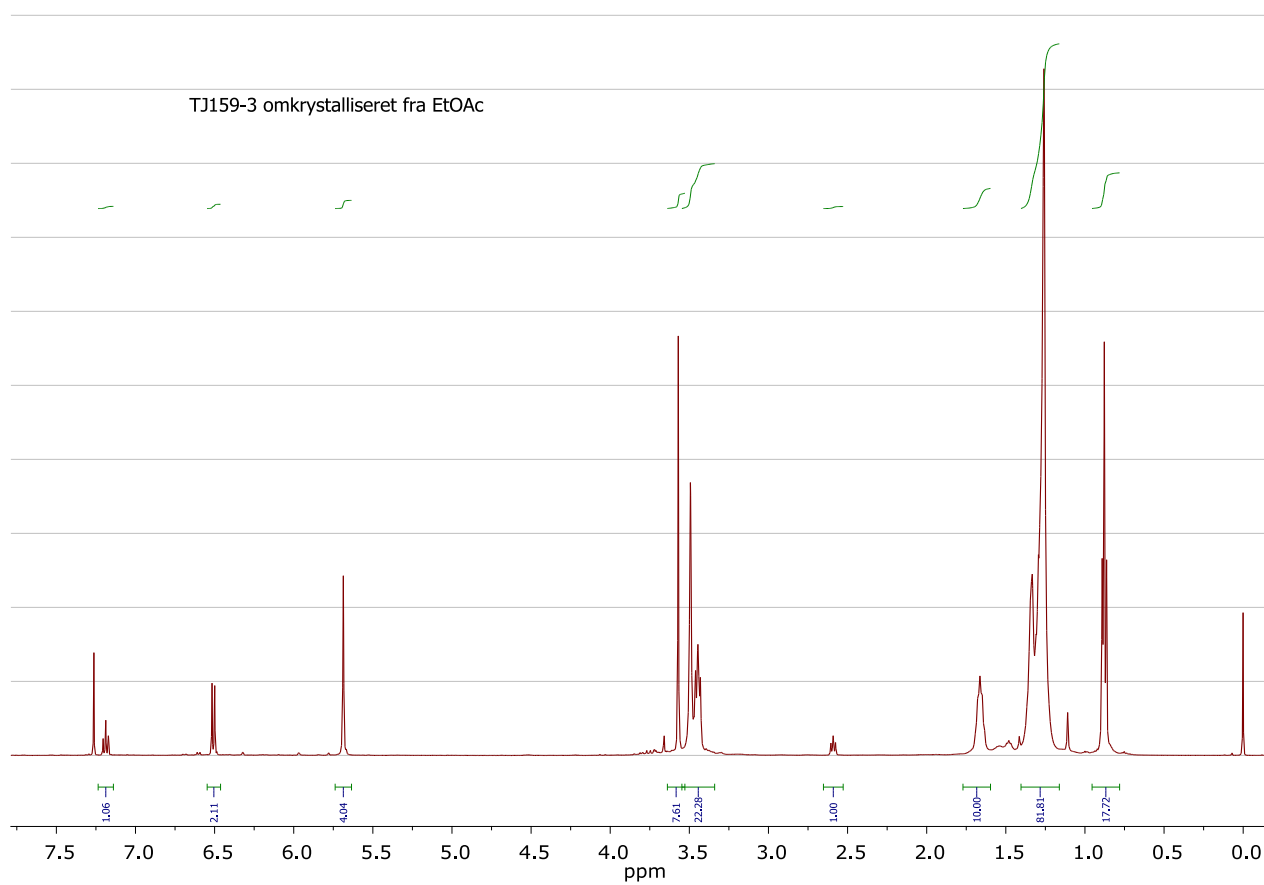

(2,6-dimethoxyphenyl)-bis(4-dimethylamino-2,6-dimethoxyphenyl)-methylium hexafluorophosphate (**6c**):

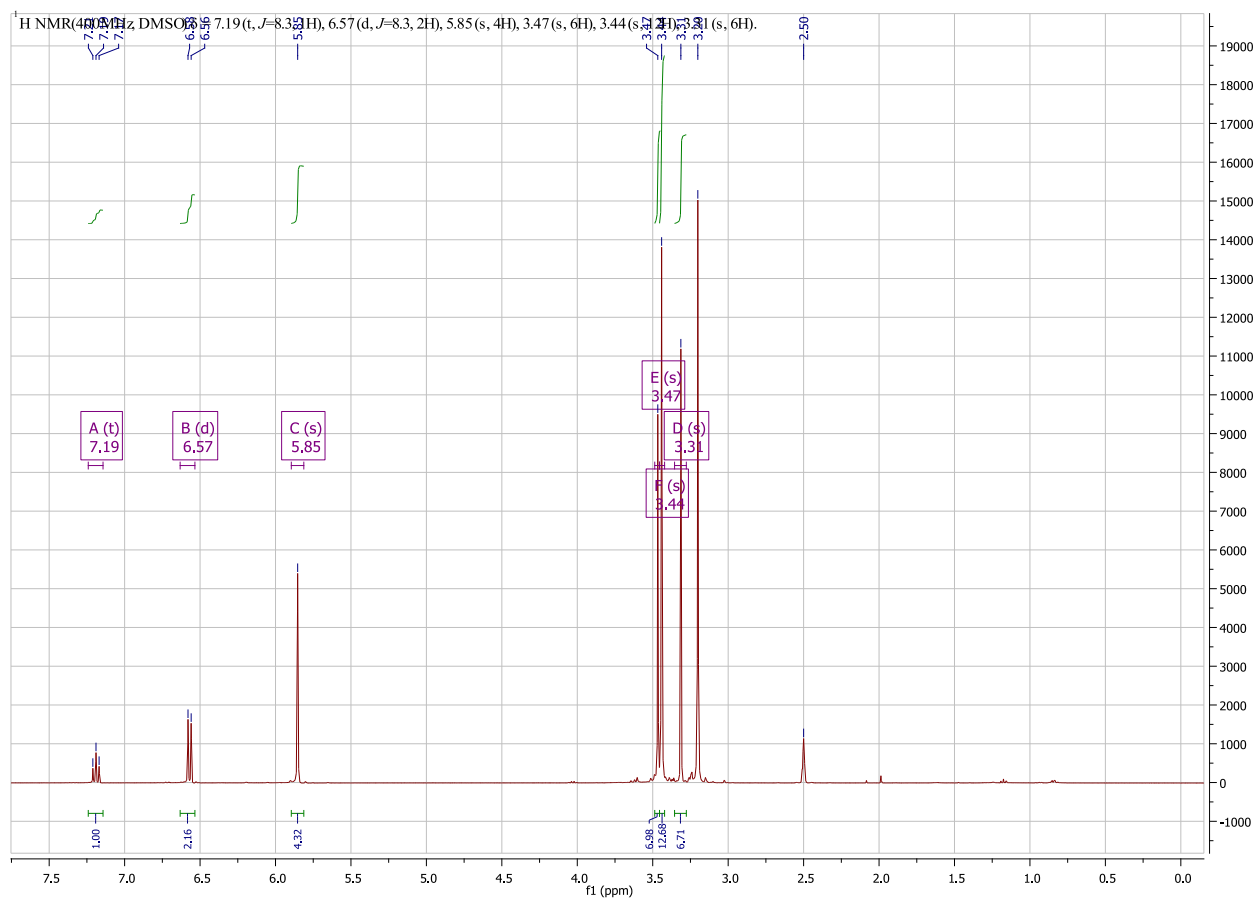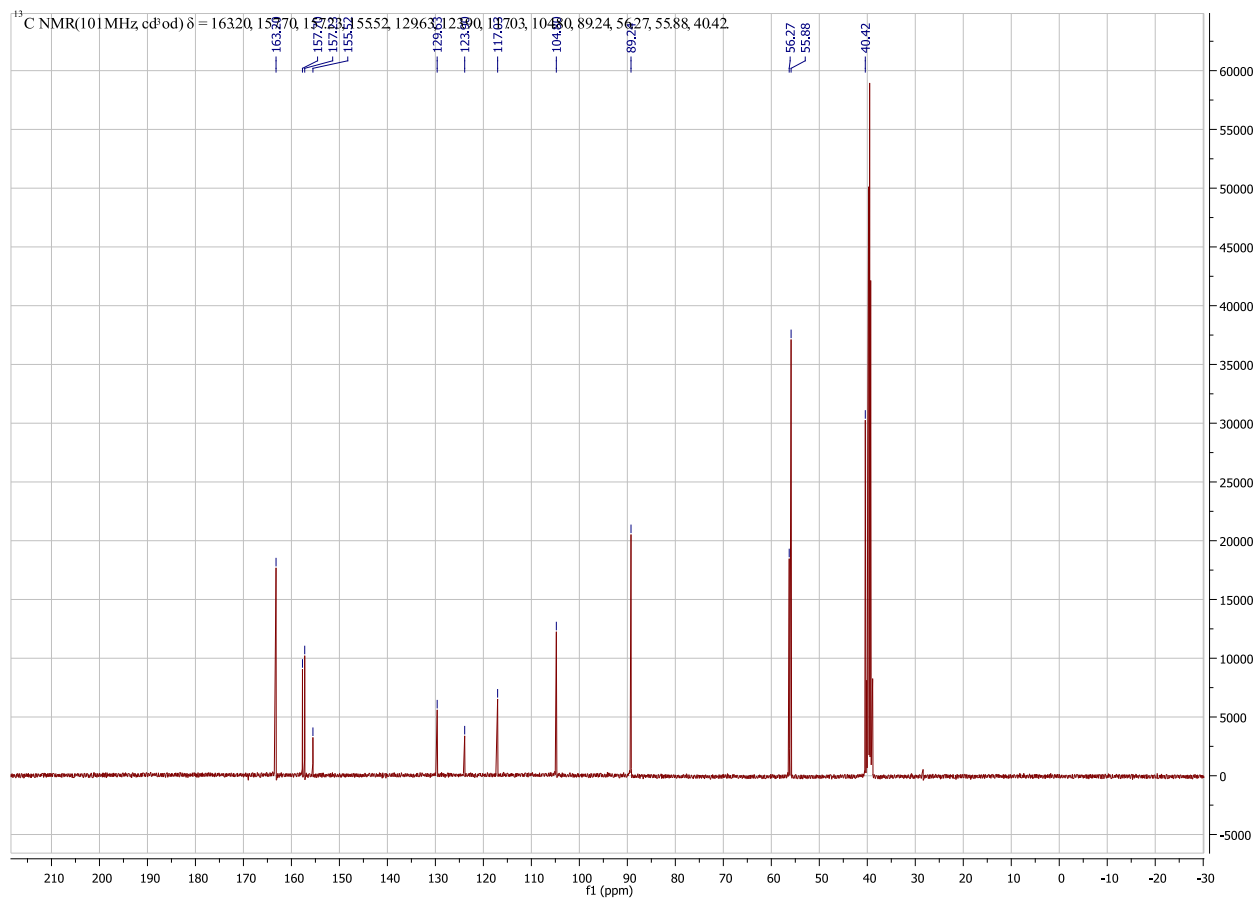

(2,6-dimethoxyphenyl)-(2,4,6-trimethoxyphenyl)-(4-didecylamino-2,6-trimethoxyphenyl)-methylum tetrafluoroborate (**7**):

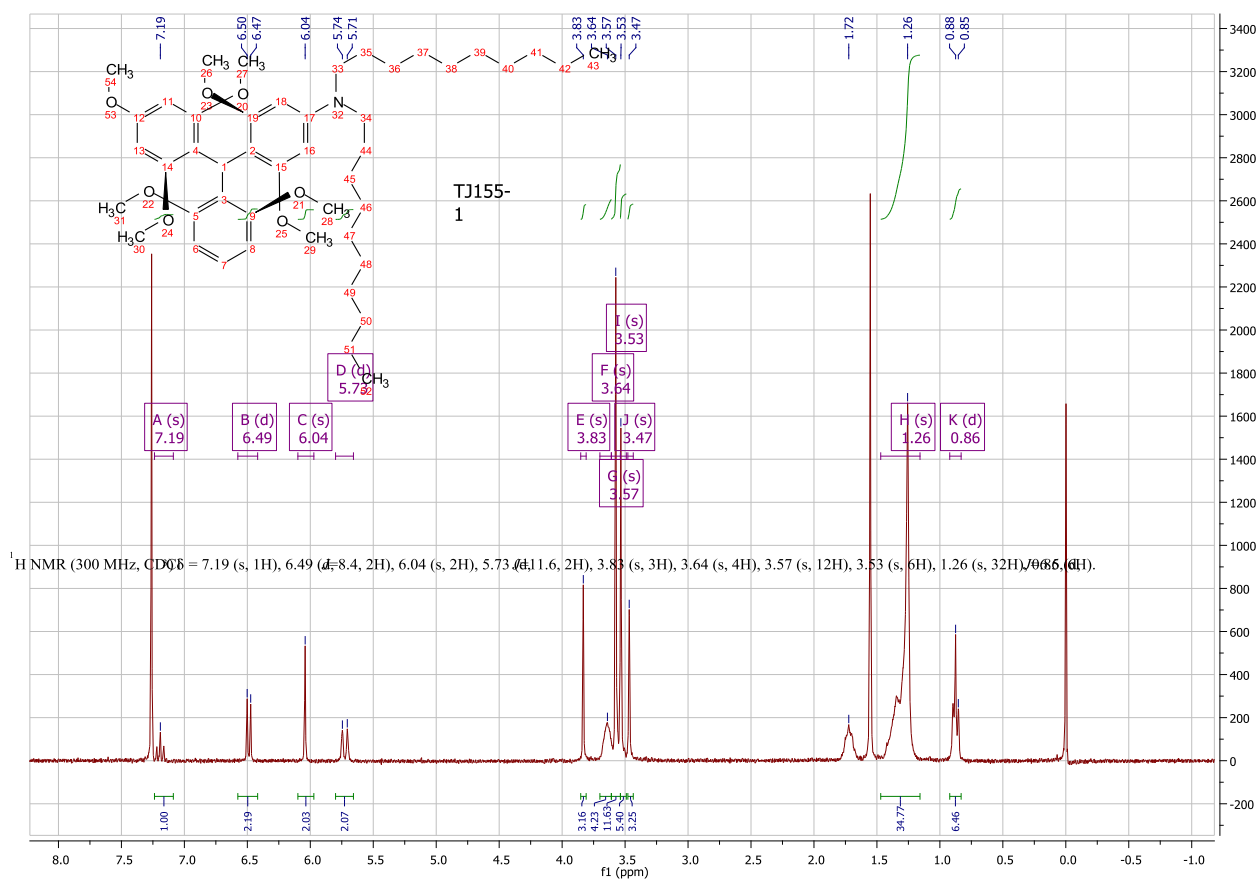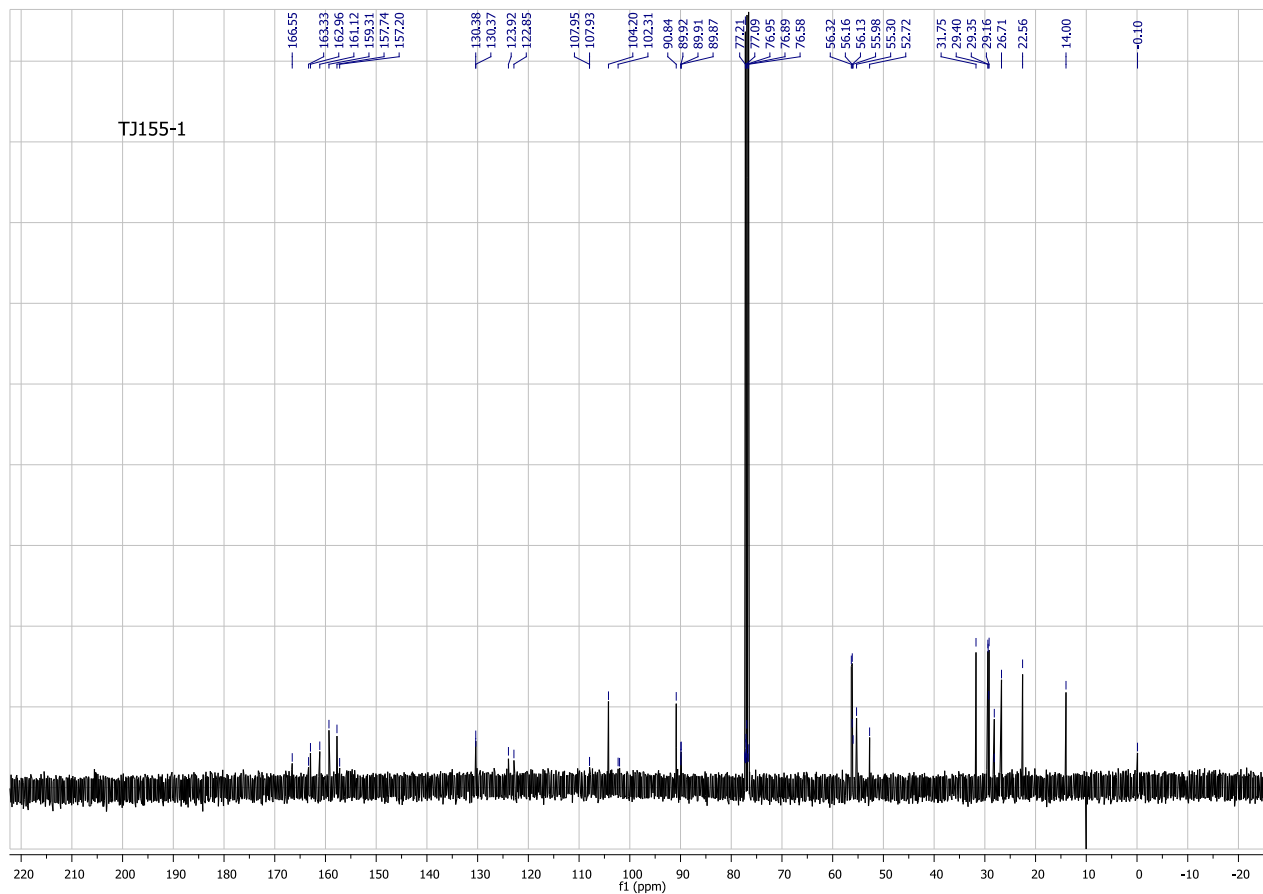

*Diethylamino-trioxatriangulenium hexafluorophosphate (8a):*

Only traces isolated!

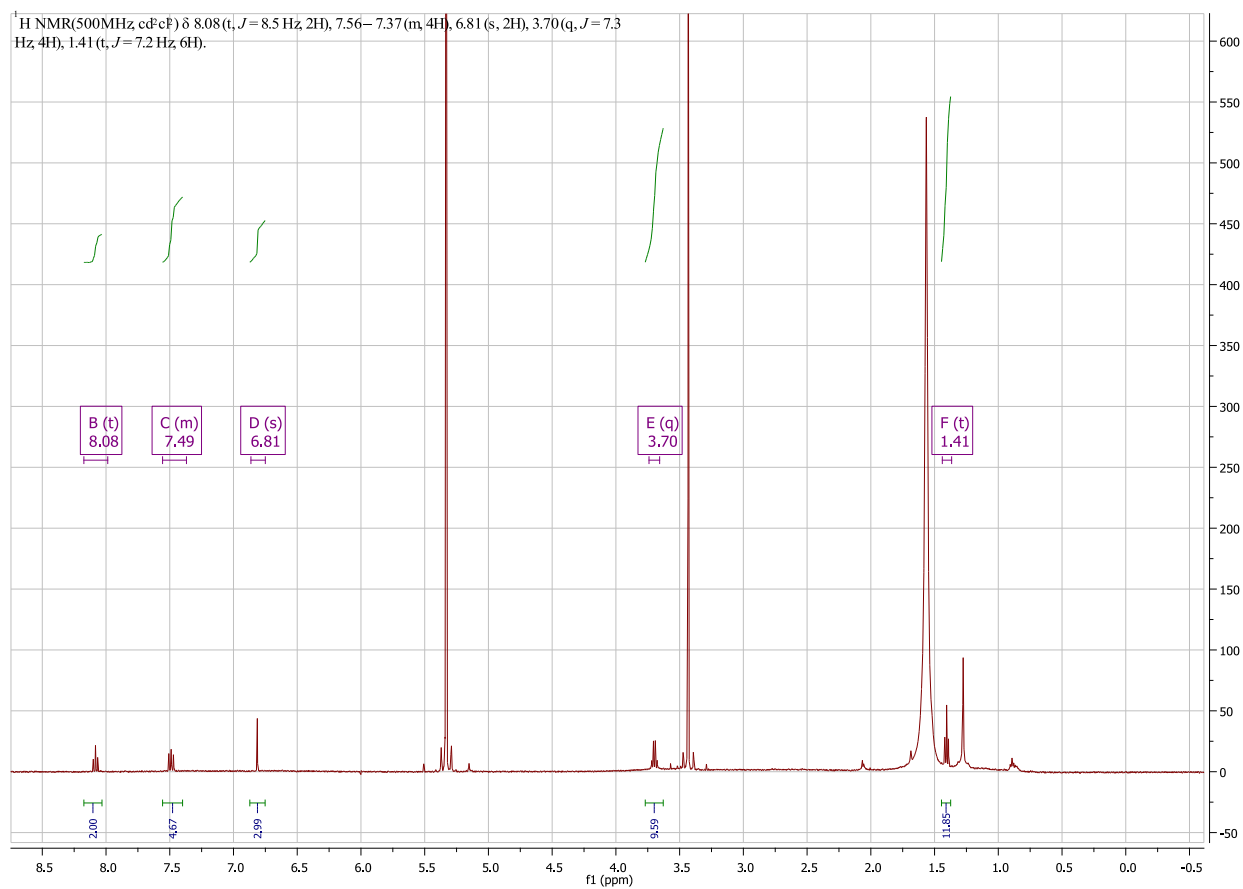

*Didecylamino-trioxatriangulenium hexafluorophosphate (8b):*

<sup>1</sup>H NMR (400 MHz, CDCl<sub>3</sub>) δ 8.01 (t, *J* = 8.5 Hz, 2H), 7.45 (d, *J* = 8.4 Hz, 2H), 7.42 (d, *J* = 8.5 Hz, 2H), 6.76 (s, 2H), 3.59 (s, 4H), 1.76 (s, 4H), 1.42 (s, 8H), 1.29 (s, 20H), 0.89 (s, 6H).

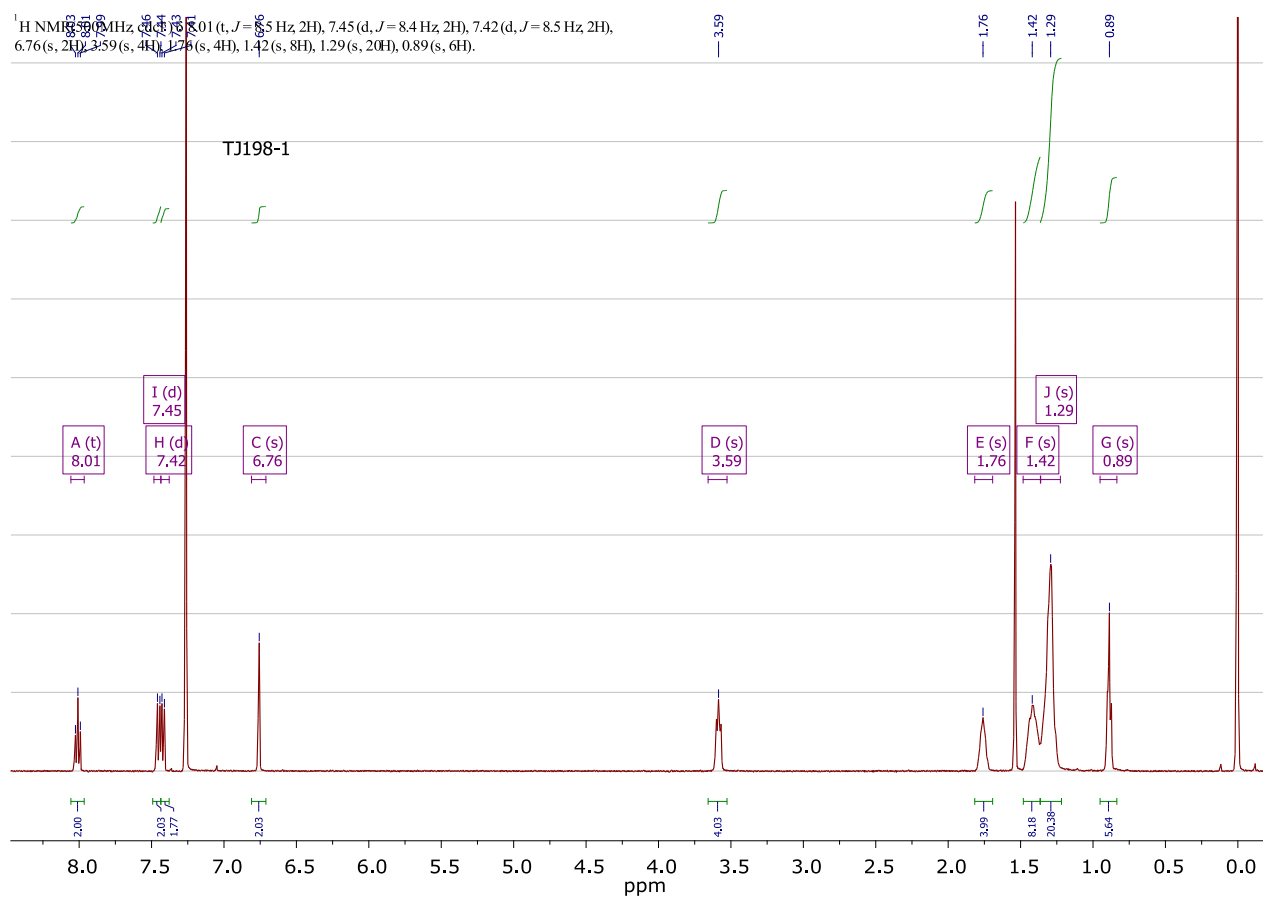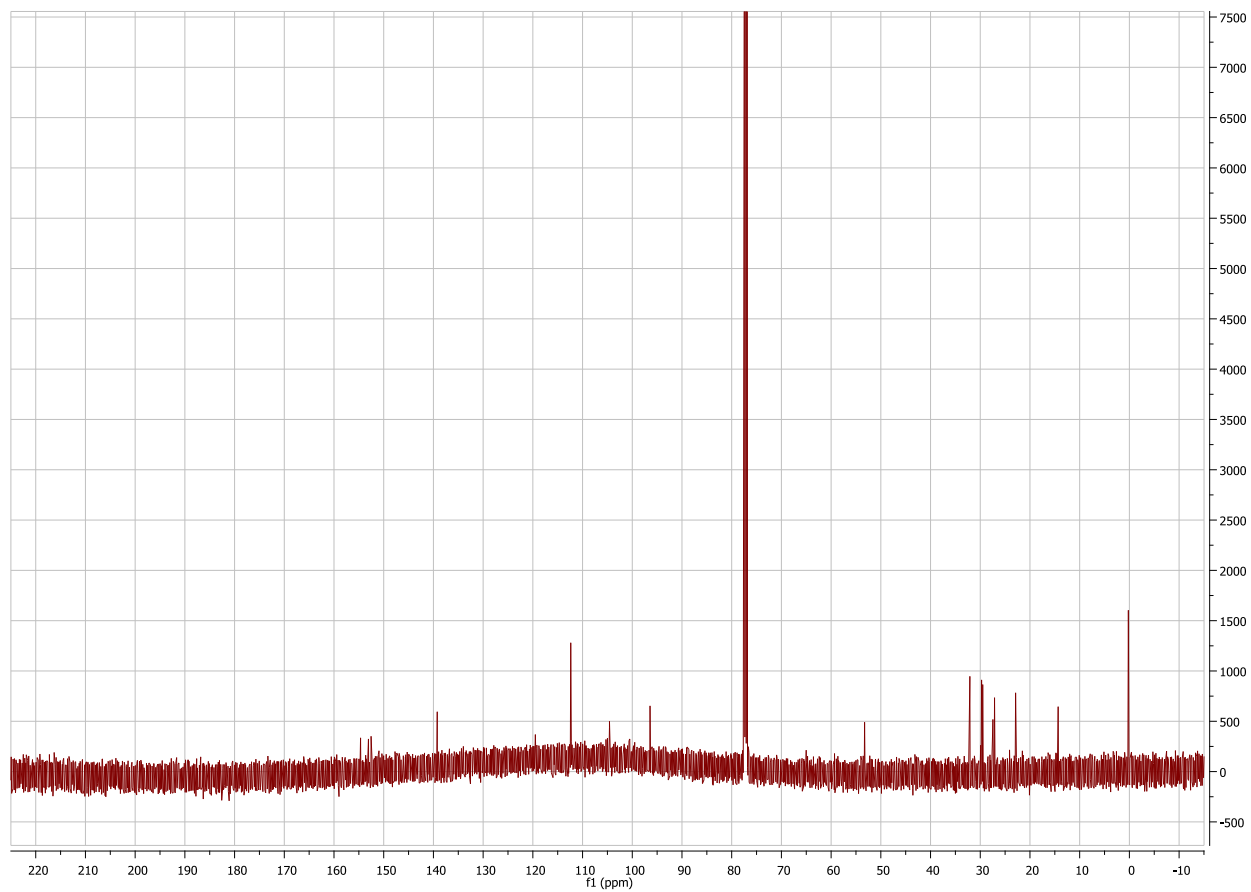

*Bis(diethylamino)-trioxatriangulenium hexafluorophosphate (9a):*

H NMR

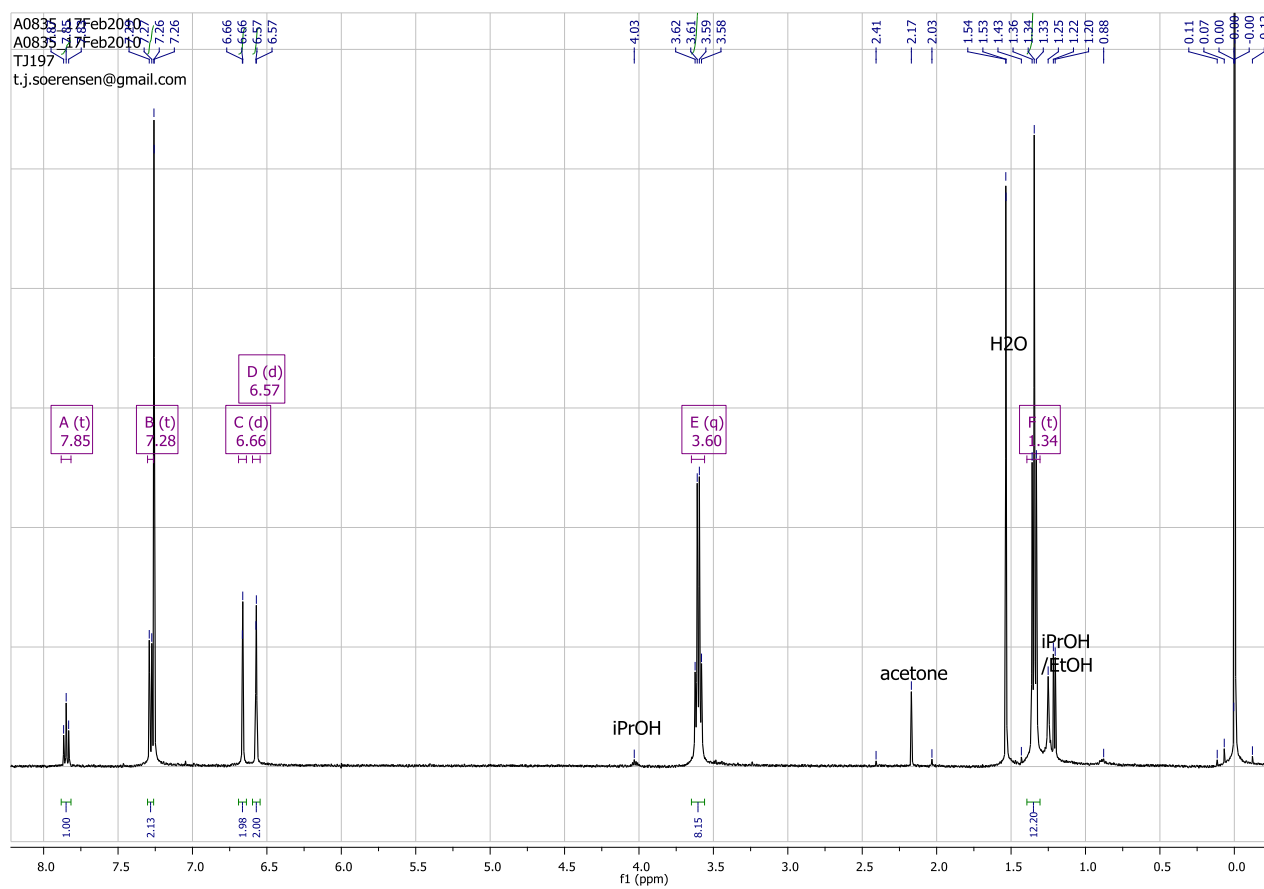

C NMR with Cr(acac)<sub>3</sub>

A0852\_23Feb2010  
A0852\_23Feb2010  
TJ197-acac  
t.j.soerensen@gmail.com

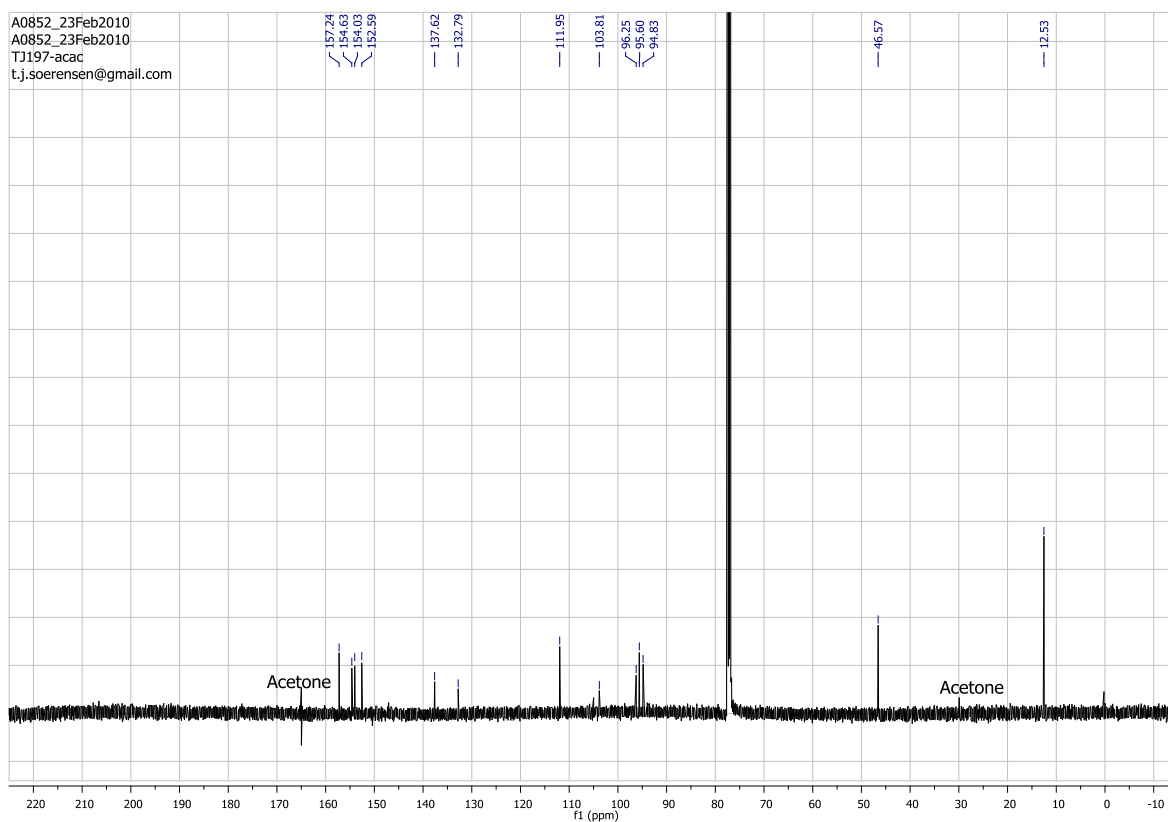

## C NMR

TJ197-1 13C  
Std proton

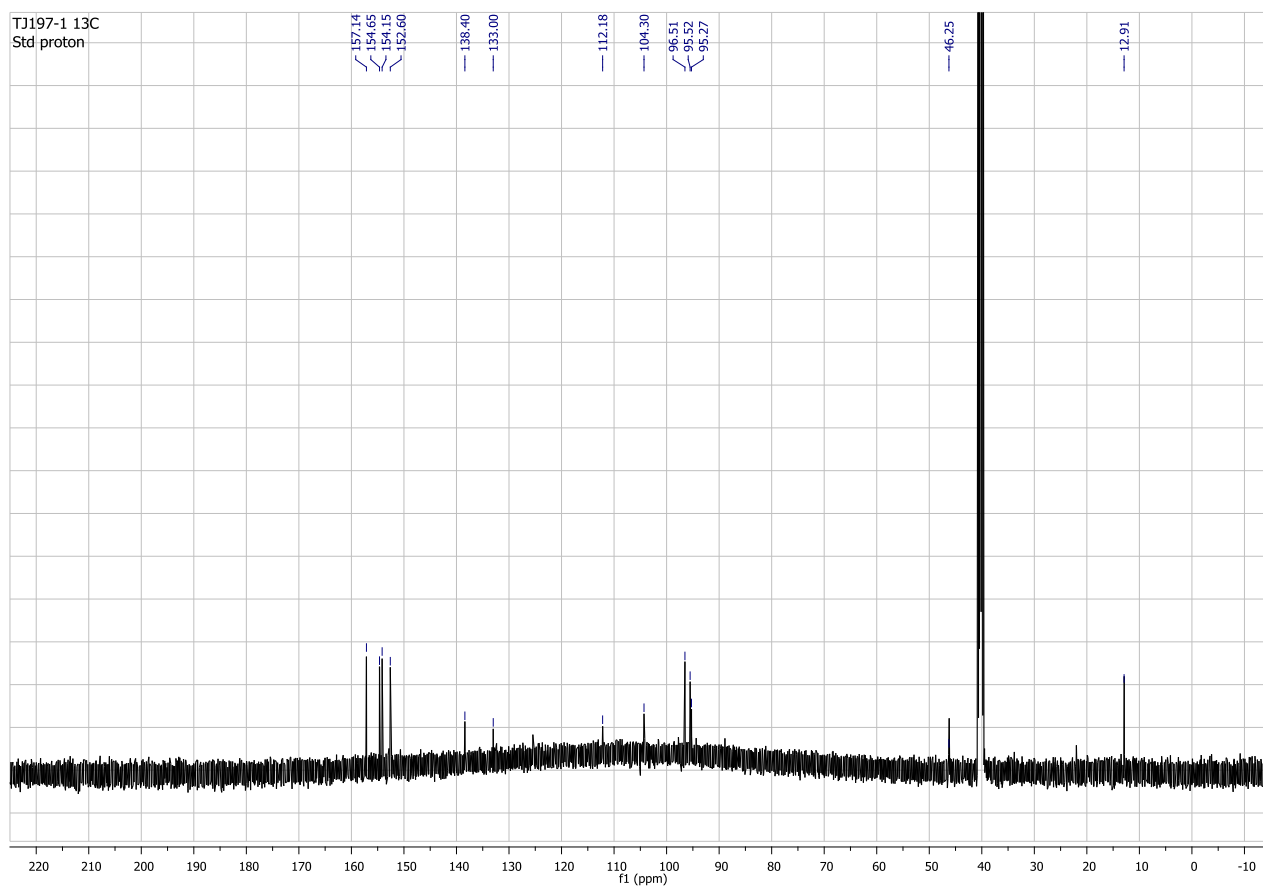

*Bis(didecylamino)-trioxatriangulenium hexafluorophosphate (9b):*

Only traces isolated!
